1  
2  
3  
4  
5  
6  
7  
8  
9  
10  
11  
12  
13  
14  
15  
16  
17  
18  
19

**The Five-Primer Challenge: An inquiry-based laboratory module for synthetic biology**

Suzie Hsu<sup>\*</sup>, Jay Huenemann<sup>†</sup>, Vishwesh Kulkarni<sup>‡</sup>, Rodrigo Ledesma-Amaro<sup>§</sup>, Robert Moseley<sup>\*\*</sup>, Nikita Mukhitov<sup>††</sup>, Rashmi Tiwari<sup>‡‡</sup>, Shue Wang<sup>§§</sup>, and Michael J. Smanski<sup>\*</sup>

<sup>\*</sup> Department of Biochemistry, Molecular Biology, and Biophysics and BioTechnology Institute, University of Minnesota – Twin Cities, Saint Paul, Minnesota 55108, USA

<sup>†</sup> Bioengineering and Bioprocessing Research, Strain Engineering, Dow AgroSciences- Indianapolis, Indiana 46268, USA

<sup>‡</sup> School of Engineering, University of Warwick, Coventry, CV4 7AL, United Kingdom

<sup>§</sup> Micalis Institute, INRA, AgroParisTech, Université Paris-Saclay, 78350 Jouy-en-Josas, France

<sup>\*\*</sup> Biosciences Division, Oak Ridge National Laboratory, Oak Ridge, Tennessee, and The Bredesen Center for Interdisciplinary Research and Graduate Education, University of Tennessee, Knoxville, Tennessee 37996, USA

<sup>††</sup> Department of Chemistry and Biochemistry, Florida State University, Tallahassee, Florida 32306, USA

<sup>‡‡</sup> PepsiCo R&D, Ingredient Discovery, Hawthorne, New York 10532, USA

<sup>§§</sup> Department of Mechanical Engineering, University of Michigan, Ann Arbor, Michigan 48109, USA

20

21 **Running Title:** The Five-Primer Challenge

22 **Keywords:** synthetic biology; gene expression; regulation; DNA assembly; inquiry-based learning

23 **Corresponding Author:** Michael J Smanski; 1479 Gortner Ave Room 140, Saint Paul, MN 55108;

24 (612)624-9752; smanski@umn.edu

25

26 **Abstract**

27 New technologies in DNA synthesis and assembly give genetic engineers complete freedom in genetic  
28 design, where virtually any plasmid DNA sequence can be created efficiently and economically. Learning  
29 how to design, construct, and test new DNA sequences is a critical skill for researchers in molecular  
30 biology and biotechnology. Here we present a student-centered, inquiry-based module in which  
31 students learn how to control bacterial gene expression by applying various DNA assembly techniques.  
32 The central activity in this learning module is termed the ‘Five-Primer Challenge’. Each student is  
33 allowed to order up to five 60-mer oligonucleotide primers to then modify a GFP expression plasmid  
34 with the goal of increasing GFP expression as much as possible. This module was developed and  
35 implemented at the 2016 Cold Spring Harbor Laboratory Synthetic Biology Course, and was effective at  
36 engaging students in critical thinking and in promoting student learning.

37 **Introduction**

38 Inquiry-based learning is a student-focused, active-learning method in which students are confronted  
39 with a problem and must design, perform, and analyze experiments to form their own conclusions. The  
40 role of an instructor in an inquiry-based learning environment is to facilitate learning and provide  
41 information where needed (Savery 2015). Providing students with research-like experiences has been

42 shown to yield superior learning outcomes than traditional teaching methods (Luckie *et al.* 2004), as  
43 long as the instructor carefully adapts activities to account for the students' incoming knowledge and  
44 skill level (Kirschner *et al.* 2006). Wet-lab experiments and inquiry-based projects can reinforce material  
45 learned during didactic lectures and provide a venue for practicing the formation of hypotheses, design  
46 of experiments, and critical analysis of data (Myers and Burgess 2003). Learning modules that  
47 incorporate several styles of instruction accommodate students with diverse learning styles and  
48 promote teamwork skills such as brainstorming, scientific discussion, and decision-making, which are  
49 difficult to teach solely via lecture-based instruction. Engaging students actively in problem-solving and  
50 experimentation is an important component of science education. Inquiry-based laboratory curricula  
51 have been successfully applied to teach molecular biology (Bugarcic *et al.* 2012) and biochemistry (Gray  
52 *et al.* 2015) in the past, but additional modules are needed to address rapid technological progress in  
53 these areas and the emerging field of synthetic biology.

54 A prominent example of inquiry-based learning in the synthetic biology community is the  
55 BioBricks foundation and the international Genetically Engineered Machines (iGEM) competition  
56 (Smolke 2009; Mitchell *et al.* 2011). The objective-oriented team competition gives students first-hand  
57 experience in hypothesis-driven research, and the foundation provides access to genetic reagents to  
58 make this experience economically viable for hundreds of schools around the world, and students  
59 ranging from high school to graduate school participate (Mitchell *et al.* 2011). However, the iGEM  
60 competitions require significant time and resource investment to mentor students, oversee research,  
61 develop project presentations, and travel to competitions. Also, the number of participants in iGEM  
62 teams at most universities is a small fraction of the population majoring in biotechnology related fields.  
63 Inquiry-based lab experiments that are more easily incorporated into core lab-course curricula are  
64 needed to provide the majority of students with similar inquiry-driven research experience. Ideally,

65 these modules would retain aspects of student-driven hypothesis creation and experimental design as  
66 they are scaled-up to accommodate more students.

67 DNA synthesis and assembly methods have rapidly advanced in the past decade and represent a  
68 valuable skill set for new students trained for careers in biotechnology (Ellis *et al.* 2011). With low cost  
69 and rapid turnaround time for DNA synthesis, it is feasible to incorporate student-driven genetic  
70 engineering experiments in an educational setting. In one notable example, an undergraduate course  
71 was taught *de novo* synthesis of DNA in a semester-long inquiry-based setting (Dymond *et al.* 2009). We  
72 sought to build on this effort by developing a learning module where students apply knowledge gained  
73 through didactic lectures on the control of gene expression to design experiments that require DNA  
74 synthesis and assembly towards a realistic genetic engineering goal.

75 In the following sections, we describe a novel, inquiry-based learning module to teach students  
76 fundamental aspects of engineering bacterial gene expression and introduce them to several practical  
77 DNA assembly methods: Isothermal (Gibson) Assembly, Golden Gate Assembly, and PCR ligation. The  
78 immediate learning objectives of the module focus on understanding the principles and concepts of  
79 each DNA assembly method and learning protocols for setting up reactions as well as analyzing  
80 experimental results. At a higher level, students learn the advantages, limitations, and failure modes of  
81 each method so that they can apply them to support large-scale DNA assembly projects. Ultimately, the  
82 knowledge laid the foundation for the students to create and validate DNA assembly solutions to the  
83 Five-Primer Challenge. This module was conceived and demonstrated at the Cold Spring Harbor  
84 Laboratory Summer Course in Synthetic Biology (<https://cshsynbio.wordpress.com/>). The aim of this  
85 publication is to provide an architecture for a fun, engaging, inquiry-based teaching module that can be  
86 taught either as part of a rigorous one-week short course, or used as a component in a semester-long  
87 laboratory course in synthetic biology or genetics.

## 88 **Materials and Methods**

89 Project Participants. The Cold Spring Harbor Synthetic Biology Course is a two-week long course, taught  
90 yearly since its founding in 2013, that focuses on exposing students to state-of-the-art synthetic biology  
91 techniques and methods. The course is broken up into two sections; the first week consists of one-day  
92 modules that entail a balance of lecture and lab work on various synthetic biology topics (*e.g.* DNA  
93 assembly methods, biological modeling, *in vitro* transcription/translation systems, etc), while the second  
94 week involves the students participating in more intensive laboratory-based modules. The module  
95 described here was designed to be implemented in a rigorous short-course, however the content could  
96 easily be delivered in a less intensive course, spread out over many weeks.

97 The sixteen students in the 2016 course were at various stages in their careers and included PhD  
98 students, industry professionals, and academic assistant professors. Skill levels ranged from no previous  
99 wet-lab experience to multiple years of experience in genetic engineering. The low student:teacher ratio  
100 (4:1) for a particular module allowed for individual attention to be given to students at differing ability  
101 levels.

102 Learning objectives. The measurable learning objectives for the module as a whole are as follows:

- 103 1. Students are able to design genetic constructs at a high level of abstraction (*e.g.* plasmid map)  
104 that encode a bacterial expression unit, taking into consideration *cis*-regulatory elements  
105 required for efficient transcription and translation.
- 106 2. Students are able to design, at the DNA sequence level, rational mutations to a bacterial  
107 expression unit towards an objective function of increasing or decreasing transcription and/or  
108 translation rates of the encoded gene.
- 109 3. Students are able to design oligonucleotide primers to be used in a Gibson DNA assembly  
110 reaction that will allow (i) the seamless fusion of two distinct genetic elements, or (ii) the  
111 introduction of designed mutations at or near the junctions of two distinct genetic elements.

- 112 4. Students are able to design oligonucleotide primers to be used in a Type IIS (Golden Gate  
113 assembly reaction that will allow (i) the seamless fusion of two distinct genetic elements, or (ii)  
114 the introduction of designed mutations at or near the junctions of two distinct genetic elements.
- 115 5. Students are able to design oligonucleotide primers to be used in a PCR-ligation reaction that  
116 will produce allow the introduction of designed mutations at or near the ligation junction.
- 117 6. Students can design a DNA assembly plan to create a plasmid of interest, taking into  
118 consideration the strengths, weaknesses, and failure modes of Gibson, Golden Gate, and PCR-  
119 ligation reactions to select appropriate methods.

120 Module design. At the outset of the module, students were introduced to the Five-Primer Challenge.  
121 Foundational knowledge and wet-bench skills required to complete the challenge were established  
122 through a series of white-board lectures, mini-labs, and literature discussions (Table 1). During the Cold  
123 Spring Harbor Short Course, mini-lectures and labs took place during the first two days of the module  
124 (typically a different lecture/lab combination each morning and afternoon section). On the third day,  
125 students were given the morning to design their DNA assembly strategies and order their five  
126 oligonucleotides, and the afternoon was spent in a literature discussion/lecture focused on integrating  
127 the molecular methods to create an overall DNA assembly pipeline tailored to a specific project.  
128 Students used the fourth day to build their plasmids and transform an *E. coli* expression host, and all  
129 recombinant strains were cultured and analyzed on the fifth day by fluorescent plate reader or flow  
130 cytometry.

131 Assessment of Student Learning. Student learning was measured using a combination of informal and  
132 formal techniques. Content-driven white-board lectures were interrupted with multiple-choice  
133 questions (Supplementary Information) to gauge students' understanding of key concepts and engage  
134 students in critical thinking. Homework assignments were practically oriented and included (i) the  
135 manipulation of DNA sequence files using plasmid editing software (ApE,

136 <http://biologylabs.utah.edu/jorgensen/wayned/ape/>) (Assignment 1, Supplementary Information), (ii)  
137 the design of oligonucleotide primer sequences that could be used to achieve a desired DNA assembly  
138 product (Assignment 1, Supplementary Information), and (iii) use of the RBS Calculator  
139 (<https://www.denovodna.com/software/>) to design ribosome binding sites of various strength  
140 (Assignment 2, Supplementary Information). Misconceptions were addressed immediately with students  
141 in small group settings. Critical thinking and problem solving capabilities were informally assessed by  
142 reviewing student-proposed solutions to the Five-Primer Challenge. Successful solutions were judged by  
143 (i) the likelihood that the plasmid design changes would reasonably lead to increased cellular  
144 fluorescence, and (ii) whether the oligonucleotide sequences and proposed DNA assembly strategy were  
145 feasible to achieve the plasmid design changes. Rank-order results from the Five-Primer Challenge did  
146 not factor into assignment of grades, but a symbolic prize was given to the winner. A post-course survey  
147 was administered to gather student feedback on course and learning objectives, but no formal final  
148 examinations were given during the CSHL Synthetic Biology Course.

149 *Experimental methods.* Detailed description of the experimental materials and methods used for  
150 laboratory work described in this manuscript can be found in the Supplementary Materials.

## 151 **Results**

152 *Demonstration of student learning in primer design activities.* The student's ability to successfully design  
153 primers for a Gibson Assembly was assessed before and after participation in the Five-Primer Challenge.  
154 Immediately following the mini-lecture on Gibson Assembly, students from Session 2 were supplied with  
155 electronic files containing annotated sequence files for two plasmids: one was a GFP-expression plasmid  
156 containing a kanamycin resistance marker, and a second containing an ampicillin resistance marker.  
157 Students were asked to generate four oligonucleotide primers that could be used to amplify DNA  
158 fragments from these plasmids that could be assembled via a Gibson Reaction to replace the kanamycin

159 marker with an ampicillin marker in the opposite orientation (*i.e.* transcribed from the opposite strand  
160 as the kanamycin gene, but in the same position on the plasmid). Three of the five students produced  
161 primer designs that would not produce dsDNA fragments that would properly assemble in a Gibson  
162 reaction. Two of the five students produced primer designs that would properly assemble, but would  
163 not lead to functional expression of the new resistance cassette, as the cis-acting regulatory elements  
164 were positioned inappropriately. These incorrectly designed primers were used as a teaching tool in a  
165 follow-up lecture, and the reasons why they would fail were discussed in detail. At the end of the 4-day  
166 teaching module, students were given a similar problem and 5/5 produced appropriate primer designs.

167 Comparing DNA assembly efficiencies in a model system. Students performed two lab exercises on day  
168 one, comparing Golden Gate and Gibson Assembly reactions performed with 2, 3, or 5 DNA fragments.  
169 Each assembly reaction produced the same GFP expression plasmid, which would only result in GFP  
170 production in correctly assembled plasmids. Because of this, *E. coli* colonies could be screened visually  
171 using a transilluminator to determine reaction efficiency (Figure 2), and costly validation by plasmid  
172 sequencing could be avoided. For both Golden Gate and Gibson Assembly reactions, two- and three-  
173 piece reactions were more efficient than five-piece reactions, with Golden Gate performing slightly  
174 better than Gibson for the more complex assemblies (Figure 2). During the CSHL short course, a parallel  
175 experiment aiming to minimized reaction volumes was performed where total reaction volumes ranged  
176 from 2  $\mu\text{L}$  to 125 nL. Precision mixing of substrate fragments and reagents was achieved with a LabCyte  
177 Echo liquid handler. Successful reactions were seen for each of two-, three-, and five-piece assemblies  
178 for total reaction volumes as low as 250  $\mu\text{L}$ , with similar efficiencies as seen for the manually pipetted,  
179 10  $\mu\text{L}$  reactions (data not shown).

180 Students learn and apply diverse strategies to control protein production. The nine students who  
181 participated in the Five-Primer Challenge (four in session 1, five in session 2), were given complete  
182 freedom of genetic design to engineer a highly fluorescent strain of *E. coli*. The diverse solutions they



183 designed serve as evidence to their engagement in creative problem solving. The solutions, summarized  
184 in Figure 3 and Table 2, included manipulation of promoter strength, ribosome binding site strength,  
185 gene copy number, and synonymous mutations in the GFP CDS to reduce secondary structure during  
186 translation initiation. Many solutions used tools such as the Ribosome Binding Site Calculator that were  
187 introduced during the mini-lectures. However, a number of the students performed substantial  
188 literature review to identify additional control points that could give them an edge in the Challenge.  
189 These included non-synonymous point mutations in the GFP CDS to increase the fluorescence per  
190 protein molecule, and mutations to the plasmid origin of replication that would lead to ‘runaway  
191 replication’ and dramatically increase the copy number of the expression construct. A third category  
192 consisted of ideas that were not directly based on literature precedent, but were sound and worthy of  
193 experimental validation (Table 2). In surveys collected by Cold Spring Harbor Laboratories following the  
194 course, several students noted that the ‘thought experiments’ that were required to design solutions to  
195 the Five-Primer Challenge forced them to engage with the material more deeply than in previous  
196 molecular biology courses.

197 Assessment of student Five-Primer solutions. Students each selected an *E. coli* transformant for growth  
198 and fluorescence analysis in a 96-well plate-reader. Technical replicate measurements of GFP  
199 fluorescence were made for each transformant and are reported in Figure 3B. Student GFP reporter  
200 constructs varied in expression strength over one order of magnitude. Time limitations at the CSHL short  
201 course prevented biological replicates to be measured over multiple days, but this should be  
202 incorporated to future iterations of the Five-Primer Challenge. Results in Figure 3B are purposely not  
203 linked to genetic designs in order to encourage experimentation and creativity in the future.

## 204 **Discussion**

205 Improvements in cost, speed, efficiency, and flexibility of DNA synthesis and assembly methods now  
206 provide unprecedented freedom for designing and fabricating genetic constructs. Genetic engineers are  
207 no longer constrained by historical precedent to use one of a small number of existing expression  
208 plasmids to overproduce a protein of interest. Instead, the ability to order synthetic DNA and have it  
209 delivered next-day allows genetic engineers to easily change any aspect of a construct's design.

210 The next generation of genetic engineers need a strong foundation in both DNA synthesis/assembly  
211 methods as well as a mechanistic and theoretical understanding of gene expression; they need to know  
212 what to design and how to build it. To address this pedagogical need, we have developed and  
213 demonstrated a fun, engaging, and defined teaching module that fosters student learning and creative  
214 problem solving. Named the 'Five-Primer Challenge', this teaching module provides students with the  
215 knowledge-base and resources to rationally design, build, and test a GFP expression plasmid, with the  
216 aim of increasing total cellular fluorescence. Decreasing costs of DNA synthesis (the five primers cost  
217 ~\$50 per student for custom synthesis) enabled this experiment to be run as a competition, with each  
218 student responsible for using oligonucleotides of their own design to produce a re-engineered plasmid.

219 The merit of classroom competitions is debated in the pedagogical literature (Cantador and Conde  
220 2010). Supporters of classroom competitions note that they can increase student motivation and  
221 learning (Verhoeff 1997), and result in students spending extra effort in learning the material compared  
222 to non-competitive environments (Fasli and Michalakopoulos 2005). However, others have argued that  
223 classroom competitions generate additional stress on students that outweighs the potential benefits  
224 (Vockell 2004). There is general consensus that competitions can be organized in a way to retain the  
225 benefits while minimizing the negative aspects, for example competing as small teams, or competing as  
226 a class against previous and/or future classes (Yu *et al.* 2002).

227 Competitions are most common in computer science classrooms where students write custom programs  
228 to accomplish a narrowly-defined objective function. In the Five-Primer Challenge, the objective  
229 function is for students to create a GFP expression plasmid with the strongest possible expressed levels  
230 using the resources available to them. While critics of classroom competitions note that they can place  
231 additional stress on student performance that detracts from educational goals, this was not reported by  
232 students in the post-class survey. Two possible explanations for this include, first, that formal student  
233 assessment/evaluation is not part of the CSHL Synthetic Biology course, so performance in the  
234 competition was for 'bragging rights' only. If this module is included as part of a curriculum in molecular  
235 biology/genetic engineering, we recommend that grades are given based on the plausibility that a  
236 student's design will increase fluorescence, but not based on results of the competition. Second, a team-  
237 dynamic was introduced by the instructor claiming that he could win the challenge with only two  
238 primers. This created an extra level of competition (all students against teacher) that encouraged  
239 students to work together, brainstorming diverse strategies to win the challenge such that at least one  
240 would beat the instructor. Because of this, the Five-Primer Challenge had aspects of both a team  
241 challenge and an individual challenge.

242 Proponents of classroom competitions note improvements in time and effort spent as well as  
243 motivation and engagement (Fasli and Michalakopoulos 2005). During this module, the students spent  
244 time and effort well beyond what was expected, both at night and during meals, to brainstorm and  
245 discuss possible solutions to problem. The alternative solutions proposed (Table 2 and Figure 3) are  
246 evidence that students understand the major and minor control points for engineering heterologous  
247 protein production. Less than half of the solutions proposed were covered during the didactic lectures,  
248 with the rest coming from literature surveys or creative thinking (Table 2).

249 Several aspects of this module design could be examined further in future studies. For example, what is  
250 the impact of competition organization (all vs all, class vs instructor, no competition) on (i) the diversity

251 of solutions proposed and (ii) the amount of teamwork displayed by the students? How does  
252 participation in the didactic lectures and practical experimental labs affect the quality and diversity of  
253 student hypotheses?

254 The teaching module presented here was effective at motivating and engaging students during the CSHL  
255 Synthetic Biology course and can be incorporated into existing laboratory courses aimed at teaching  
256 students the fundamentals of molecular biology with an emphasis on biotechnology applications.

### 257 **Acknowledgement**

258 We would like to thank Schmidt-Dannert laboratory for generously giving us the pUCBB-NTH6-eGFP  
259 plasmid for the DNA assembly module. We would like to thank co-instructors at the CSHL SynBio Course,  
260 Vincent Noireaux, Chase Beisel, Mary Dunlop, Mo Khalil, and Harris Wang for help in organizing the  
261 course. Lastly we would like to thank CSHL staff members Rachel Lopez, Barbara Zane, and Breanna  
262 Demestichas for help in administering the course.

263

### 264 **References**

265 Bugarcic A., Zimbardi K., Macaranas J., Thorn P., 2012 An inquiry-based practical for a large, foundation-  
266 level undergraduate laboratory that enhances student understanding of basic cellular concepts and  
267 scientific experimental design. *Biochem. Mol. Biol. Educ.* 40: 174–180.

268 Cantador I., Conde J., 2010 Effects of competition in education: A case study in an elearning  
269 environment. *Proc. IADIS Int. Conf. e-learning.*

270 Dymond J. S., Scheifele L. Z., Richardson S., Lee P., Chandrasegaran S., *et al.*, 2009 Teaching synthetic  
271 biology, bioinformatics and engineering to undergraduates: The interdisciplinary build-a-genome  
272 course. *Genetics* 181: 13–21.

- 273 Ellis T., Adie T., Baldwin G. S., 2011 DNA assembly for synthetic biology: from parts to pathways and  
274 beyond. *Integr. Biol. (Camb)*. 3: 109–118.
- 275 Fasli M., Michalakopoulos M., 2005 Supporting active learning through game-like exercises. *Proc. - 5th*  
276 *IEEE Int. Conf. Adv. Learn. Technol. ICAALT 2005* 2005: 730–734.
- 277 Gray C., Price C. W., Lee C. T., Dewald A. H., Cline M. A., *et al.*, 2015 Known structure, unknown function:  
278 An inquiry-based undergraduate biochemistry laboratory course. *Biochem. Mol. Biol. Educ.* 43:  
279 245–262.
- 280 Handelsman J., Miller S., Pfund C., 2007 *Scientific Teaching*. W.H. Freeman and Company, New York, NY.
- 281 Kirschner P. A., Sweller J., Clark R. E., 2006 Why Minimal Guidance During Instruction Does Not Work.  
282 *Educ. Psychol.* 41: 87–98.
- 283 Luckie D. B., Maleszewski J. J., Loznak S. D., Krha M., 2004 Infusion of collaborative inquiry throughout a  
284 biology curriculum increases student learning: a four-year study of “Teams and Streams”. *Adv.*  
285 *Physiol. Educ.* 28: 199–209.
- 286 Mitchell R., Dori Y. J., Kuldell N. H., 2011 Experiential Engineering Through iGEM-An Undergraduate  
287 Summer Competition in Synthetic Biology. *J. Sci. Educ. Technol.* 20: 156–160.
- 288 Myers M. J., Burgess A. B., 2003 Inquiry-based laboratory course improves students’ ability to design  
289 experiments and interpret data. *Adv. Physiol. Educ.* 27: 26–33.
- 290 Savery J. R., 2015 Overview of Problem-Based Learning: Essent. Readings *Probl. Learn.* 1: 5–16.
- 291 Smolke C. D., 2009 Building outside of the box: iGEM and the BioBricks Foundation. *Nat. Biotechnol.* 27:  
292 1099–1102.
- 293 Verhoeff T., 1997 The Role of Competitions in Education. *Futur. world Educ. 21st century*: 1–10.

294 Vockell E., 2004 *Educational psychology: a practical approach* (PUO-L Book, Ed.). Purdue University

295 Calumet, on-line book, Calumet.

296 Yu F. Y., Chang L. J., Liu Y. H., Chan T. W., 2002 Learning preferences towards computerised competitive

297 modes. *J. Comput. Assist. Learn.* 18: 341–350.

298 17. H. Salis. “The Ribosome Binding Site Calculator”. In *Methods in Enzymology* 498:19-42,

299 December 2011. DOI: 10.1016/B978-0-12-385120-8.00002-4.

### 300 **Figure Legends**

301 **Figure 1.** Summary of Five-Primer Challenge and learning objectives. (A) Reagents that are available to

302 students are listed, and sample graph comparing re-designed reporter plasmids is shown at right. (B)

303 Learning objectives are listed by category.

304 **Figure 2.** Sample data from practical lab experiments. (A) Schematic illustration of three laboratory

305 protocols taught during lab/practical component of module. (B) Scoring correctly assembled (green) vs

306 incorrectly assembled (white) product plasmids using a visual screen. In practice, colonies are screened

307 at a much smaller size using a UV transilluminator to more easily discriminate fluorescent vs. white

308 colonies. (C) Quantitative comparison of reaction efficiencies for Gibson (left) and Golden Gate (right)

309 assembly reactions. Efficiency is defined as the GFP-expressing colonies divided by the number of total

310 colonies. Error bars for reaction efficiency denote one standard deviation from the mean, from five

311 independent replicates.

312 **Figure 3.** Five-Primer Challenge results. (A) Summary of student solutions to increasing expression of

313 recombinant GFP in *E. coli*. (B) Plate-reader results of normalized fluorescence for student and instructor

314 designed expression constructs. Bars represent mean fluorescence of two technical replicates with error

315 bars showing range of fluorescence readings. Expression results are not connected to design changes for  
316 purpose of future competitions.

317

318

319

320

321

Table 1. Lecture and lab topics and corresponding learning goals(Handelsman *et al.* 2007)

| Lecture (L) or Laboratory (P)                                  | Learning Goals                                                                                                                                                                                                                                                                        |
|----------------------------------------------------------------|---------------------------------------------------------------------------------------------------------------------------------------------------------------------------------------------------------------------------------------------------------------------------------------|
| Introduction to Recombinant DNA Technology (L)                 | <ul style="list-style-type: none"> <li>History of rDNA technology</li> <li>Molecular biology of Type II Restriction Endonucleases, DNA polymerases, DNA Ligases</li> </ul>                                                                                                            |
| Restriction Enzyme Independent DNA Assembly (L/P)              | <ul style="list-style-type: none"> <li>Introduction to Isothermal ('Gibson') Assembly and related methods</li> <li>Laboratory assembly of GFP construct via 5-piece, 3-piece, and 2-piece Gibson Assembly</li> </ul>                                                                  |
| Type IIS Restriction Enzymes and Golden Gate Assembly (L/P)    | <ul style="list-style-type: none"> <li>Molecular biology of Type IIS Restriction Endonucleases</li> <li>Literature study of MoClo, GoldenBraid, or TNT cloning system</li> <li>Laboratory assembly of GFP construct via 5-piece, 3-piece, and 2-piece Golden Gate Assembly</li> </ul> |
| PCR-Ligation Reactions for Targeted Mutation of Plasmids (L/P) | <ul style="list-style-type: none"> <li>Introduction to theory and use of RBS calculator online tool</li> <li>Laboratory permutation of GFP ribosome binding site via PCR ligation</li> </ul>                                                                                          |
| Control of Gene Expression (L)                                 | <ul style="list-style-type: none"> <li>Molecular biology of transcription and translation</li> <li>Control points for tuning expression of a recombinant gene, including promoter, RBS, CDS, mRNA/protein stability</li> </ul>                                                        |

322

323

Table 2. Student solutions to the Five-Primer Challenge

| Discussed in mini-lectures                                                                                                                                                                                                                                              | Ideas generated based on literature review                                                                                                                                                                                                                                    | Ideas generated without literature precedent                                                                                                                                                                                                                                                                                                                                                                      |
|-------------------------------------------------------------------------------------------------------------------------------------------------------------------------------------------------------------------------------------------------------------------------|-------------------------------------------------------------------------------------------------------------------------------------------------------------------------------------------------------------------------------------------------------------------------------|-------------------------------------------------------------------------------------------------------------------------------------------------------------------------------------------------------------------------------------------------------------------------------------------------------------------------------------------------------------------------------------------------------------------|
| <ul style="list-style-type: none"> <li>Changing GFP promoter</li> <li>Re-designing GFP ribosome binding site.</li> <li>Synonymous mutations in N-terminal region of GFP CDS.</li> <li>Changing relative order/orientation of features in expression plasmid.</li> </ul> | <ul style="list-style-type: none"> <li>Non-synonymous mutations in GFP that increase fluorescence per molecule.</li> <li>Mutations in origin of replication that lead to 'runaway replication'.</li> <li>Addition of UP element upstream of -35 of promoter region</li> </ul> | <ul style="list-style-type: none"> <li>Removing all transcriptional terminators to yield long, poly-GFP mRNA from circular plasmid.</li> <li>Decrease strength of resistance marker and grow on high antibiotic concentration to select for rare mutants with strong expression from plasmid.</li> <li>Increase copy number of GFP to arbitrarily long constructs with creative DNA assembly protocol.</li> </ul> |

324



325

326 **Figure 1.**

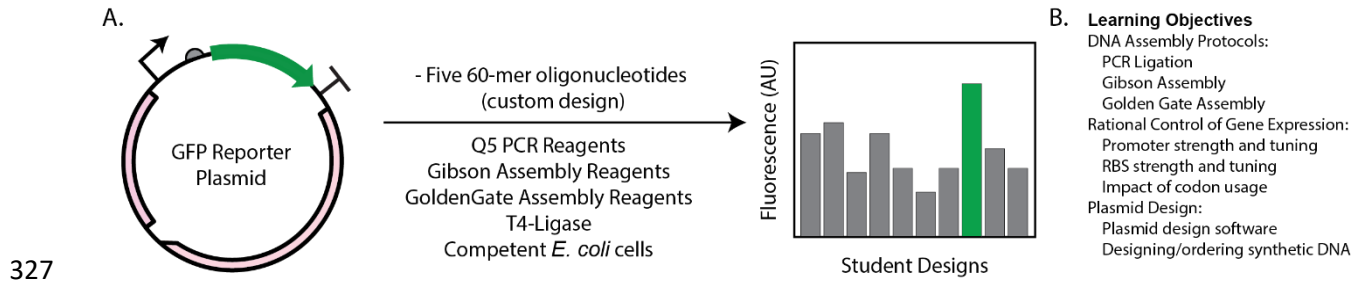

327

328

329

330 **Figure 2.**

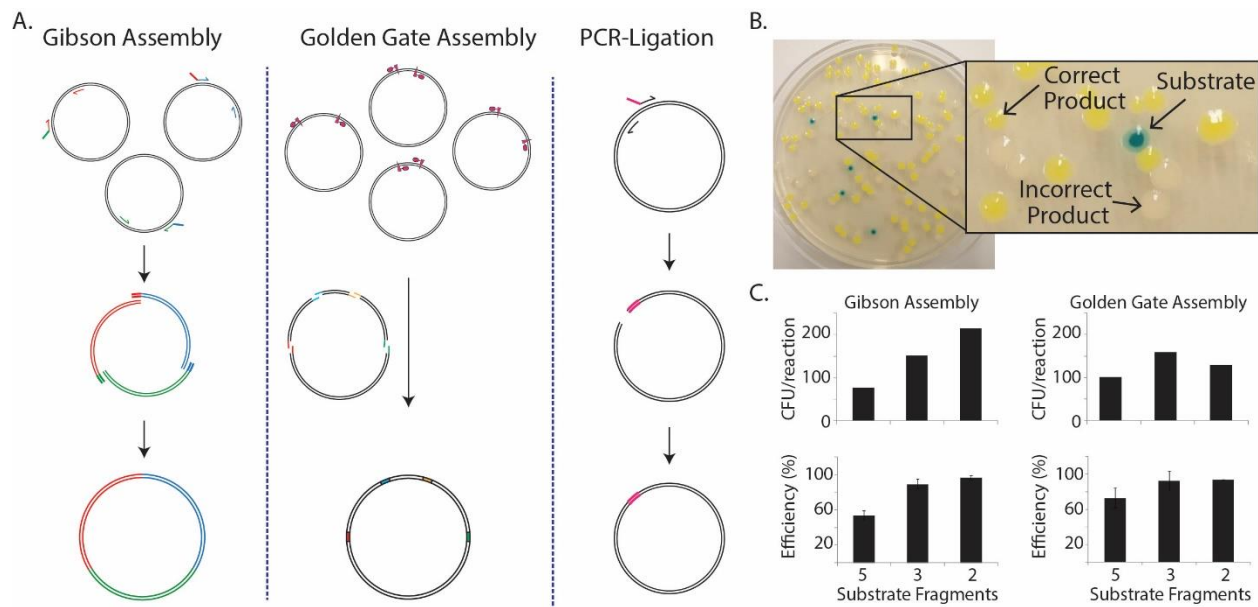

331

332

333

334 **Figure 3.**

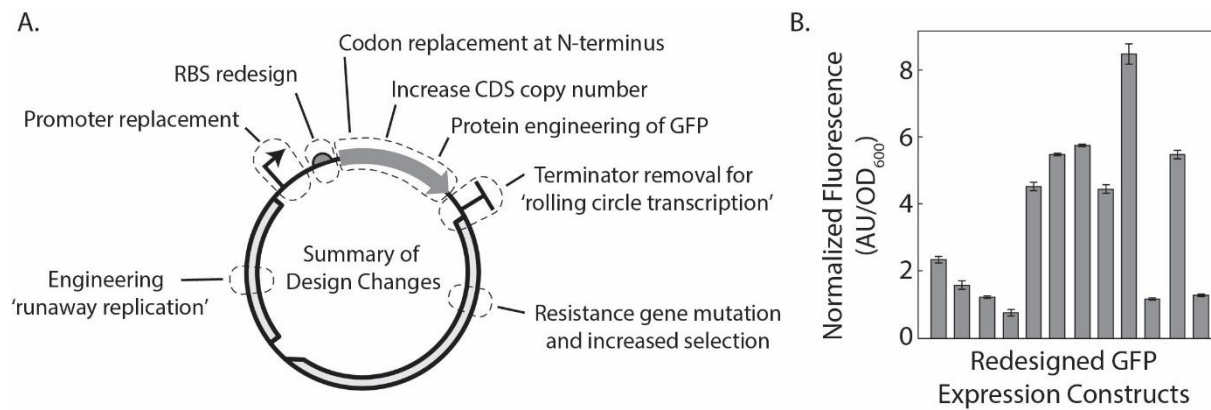

335
